# Supplementary material for: The R2R3 MYB transcription factor PavMYB10.1 involves in anthocyanin biosynthesis and determines fruit skin colour in sweet cherry (Prunus avium L.)
Source: PubMed Central journal article supplement (PMC5095807; doi:10.1111/pbi.12568), 2016-05-19
Supplement: PBI-14-2120-s001.pdf [file PBI-14-2120-s001.pdf]

***Plant Biotechnology Journal* Supporting Information Figures S1–S9 and Tables**

**S1–S3**

**Article title: The R2R3 MYB transcription factor *PavMYB10.1* involves in anthocyanin biosynthesis and determines fruit skin colour in sweet cherry**

**(*Prunus avium* L.)**

Authors: Jin, Wanmei; Wang, Hua; Li, Maofu; Wang, Jing; Yang, Yuan; Zhang, Xiaoming; Yan, Guohua; Zhang, Hong; Liu, Jiashen; Zhang, Kaichun

The following Supporting Information is available for this article:

**Figure S1.** Ripe fruit skin and flesh colour of ‘Big Dragon’, ‘Rainier’, and ‘Lapins’.

(a) Ripe fruit skin colour of ‘Big Dragon’. (b) Ripe fruit skin colour of ‘Rainier’. (c) Ripe fruit skin colour of ‘Lapins’. (d) Ripe fruit flesh colour of ‘Big Dragon’ (e) Ripe fruit flesh colour of ‘Rainier’. (f) Ripe fruit flesh colour of ‘Lapins’.

**Figure S2.** Southern blot of *PavMYB10.1* in three varieties ‘Big Dragon’, ‘Rainier’, and ‘Lapins’.

**Figure S3.** Genomic DNA sequence alignment of *PavMYB10.1a* and *PavMYB10.1b* gene between the dark red variety ‘Lapins’ and the blush ‘Rainier’. Introns shown in italics; black triangle indicates position of deletion, asterisk indicates stop codon.

**Figure S4.** Genomic DNA sequence alignment of *PavMYB10.2a* and *PavMYB10.2b* genes. Introns shown in italics and asterisk indicates stop codon.

**Figure S5.** Protein sequence alignment of PavMYB10.1, PavMYB10.2, and other genes from different species. Black arrows indicate Key amino acid residue difference.

Double-sided arrow indicates R2 and R3 domains.

**Figure S6.** Alignment cDNA of *PavMYB10.1* transcript levels in sweet cherry ‘Lapins’ and ‘Rainier’. Coding sequence alignment of *PavMYB10.1a* and *PavMYB10.1b* between dark-red variety ‘Lapins’ and blush variety ‘Rainier’. Upwards arrow indicates position of deletion, asterisk marks stop codon.

**Figure S7.** Alignment cDNA of *PavMYB10.2a* and *PavMYB10.2b* gene. Coding sequence alignment of *PavMYB10.2a* and *PavMYB10.2b* between dark-red variety ‘Lapins’ and blush variety ‘Rainier’. asterisk marks stop codon.

**Figure S8.** Cellular localization of *PavMYB10.1* in onion epidermal cells. Onion bulb cells were bombarded with gold particles coated with plasmids. (a) The combination of cell morphology in dark field for green fluorescence and bright light for pEZS-NL-GFP. (b) Cell morphology in dark field for green fluorescence for pEZS-NL-GFP. (c) Cell morphology in bright light for pEZS-NL-GFP. (d) The combination of cell morphology in dark field for green fluorescence and bright light for pEZS-NL-*PavMYB10.1*-GFP. (e) Cell morphology in dark field for green fluorescence for pEZS-NL-*PavMYB10.1*-GFP. (f) Cell morphology in bright light for pEZS-NL-*PavMYB10.1*-GFP.

**Figure S9** Interaction of *PavMYB10.1* with *PavbHLH* and *PavWD40*. (a) Schematics of *PavMYB10.1a* and *PavMYB10.1b* constructs used in yeast two-hybrid assays. Solid circle marks stop codon. (b) Yeast two-hybrid assays of *PavMYB10.1a* and *PavMYB10.1b* with *PavbHLH* and *PavWD40*. Indicated combinations of bait (BD fusion) and prey (AD fusion) constructs were introduced into yeast reporter strain AH109. Transformants were streaked on selective medium (SD/-Leu-Trp) and then

the single clone on medium (SD/-Leu-Trp) were inoculated on selective medium (SD/-Ade-His-Leu-Trp). Empty vectors pGBKT7 and pGADT7 were negative controls. Plates were photographed after incubation at 30°C for 7 days.

**Table S1** Correlations between anthocyanin content and relative expressions of *PavMYB10.1* and structural genes in ‘Big Dragon’, ‘Rainier’, and ‘Lapins’.

**Table S2** Correlations between relative expressions of *PavMYB10.1* and relative expressions of structural genes in ‘Big Dragon’, ‘Rainier’, and ‘Lapins’.

**Table S3** Sequences of oligonucleotide primers used in this work (F, forward; R, reverse).

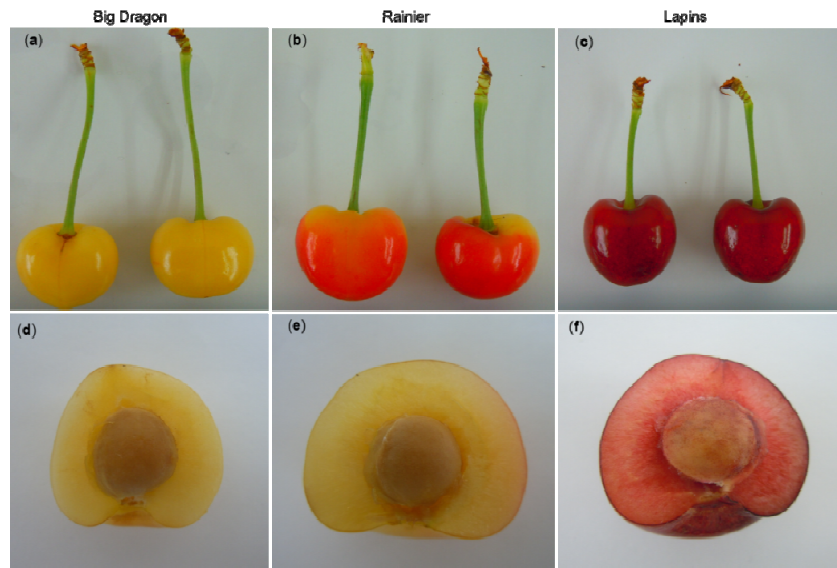

**Figure S1** Ripe fruit skin and flesh colours of ‘Big Dragon’, ‘Rainier’, and ‘Lapins’.

(a) Ripe fruit skin colour of ‘Big Dragon’. (b) Ripe fruit skin colour of ‘Rainier’. (c) Ripe fruit skin colour of ‘Lapins’. (d) Ripe fruit flesh colour of ‘Big Dragon’. (e) Ripe fruit flesh colour of ‘Rainier’. (f) Ripe fruit flesh colour of ‘Lapins’.

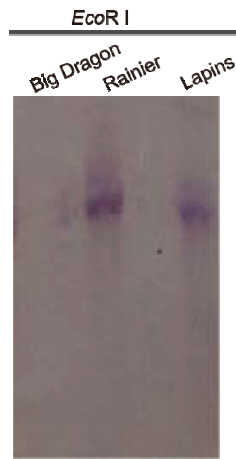

**Figure S2** Southern blot of *PavMYB10.1* in three varieties 'Big Dragon', 'Rainier', and 'Lapins'.

*Lapins MYB10.1a* ATGGAGGGCTATAACTGGGTGTGAGAAAAGGAGCTTGGACTAAAGAGGAAAGATGATGTTTTGAGGCAAGTGCATTGAGAATCATGGAGAAGGAAAGTGGTCAACAGTCTTCAAAAGCA 120  
M E G Y N L G V R K G A W T K E E D D V L R Q C I E N H G E G K W Y Q V P Y K A

*Lapins MYB10.1b* ATGGAGGGCTATAACTGGGTGTGAGAAAAGGAGCTTGGACTAAAGAGGAAAGATGATGTTTTGAGGCAAGTGCATTGAGAATCATGGAGAAGGAAAGTGGTCAACAGTCTTCAAAAGCA  
M E G Y N L G V R K G A W T K E E D D V L R Q C I E N H G E G K W Y Q V P Y K A

*Rainier MYB10.1b* ATGGAGGGCTATAACTGGGTGTGAGAAAAGGAGCTTGGACTAAAGAGGAAAGATGATGTTTTGAGGCAAGTGCATTGAGAATCATGGAGAAGGAAAGTGGTCAACAGTCTTCAAAAGCA  
M E G Y N L G V R K G A W T K E E D D V L R Q C I E N H G E G K W Y Q V P Y K A

*Lapins MYB10.1a* GGTATTAATGTAATATAGCTCAAAGAGAGATATGATATAGATTGTTTCATATATAGCTAGAGCTTAATAGGCAGTGAAGCCTTAATTAATAGTATGTACAAGGCTTAAACTT 240  
*Lapins MYB10.1b* GGTATTAATGTAATATAGCTCAAAGAGAGATATGATATAGATTGTTTCATATATAGCTAGAGCTTAATAGGCAGTGAAGCCTTAATTAATAGTATGTACAAGGCTTAAACTT  
*Rainier MYB10.1b* GGTATTAATGTAATATAGCTCAAAGAGAGATATGATATAGATTGTTTCATATATAGCTAGAGCTTAATAGGCAGTGAAGCCTTAATTAATAGTATGTACAAGGCTTAAACTT

*Lapins MYB10.1a* CTCACATATTGCAAAATGGTTGCTTTAAATTTTGTCTTCCAGCTAGGCCAATAGTCACTAGTCTCTATATTATTCACTATTATGTTGTCTCCGTTTGTAGTCAAAATGATAT 360  
*Lapins MYB10.1b* CTCACATATTGCAAAATGGTTGCTTTAAATTTTGTCTTCCAGCTAGGCCAATAGTCACTAGTCTCTATATTATTCACTATTATGTTGTCTCCGTTTGTAGTCAAAATGATAT  
*Rainier MYB10.1b* CTCACATATTGCAAAATGGTTGCTTTAAATTTTGTCTTCCAGCTAGGCCAATAGTCACTAGTCTCTATATTATTCACTATTATGTTGTCTCCGTTTGTAGTCAAAATGATAT

*Lapins MYB10.1a* TAGTCGTGGATCGAGTGGTGTCTAATAGACTTATCCACATCGGGAATTTTTGCATTATGCATGGATGCAGGGTTGAACAGGTGAGGAGGCTGTAGACTAAGTGGTGAACATTT 480  
G L N R C R R S C R L R W L N Y L  
*Lapins MYB10.1b* TAGTCGTGGATCGAGTGGTGTCTAATAGACTTATCCACATCGGGAATTTTTGCATTATGCATGGATGCAGGGTTGAACAGGTGAGGAGGCTGTAGACTAAGTGGTGAACATTT  
G L N R C R R S C R L R W L N Y L  
*Rainier MYB10.1b* TAGTCGTGGATCGAGTGGTGTCTAATAGACTTATCCACATCGGGAATTTTTGCATTATGCATGGATGCAGGGTTGAACAGGTGAGGAGGCTGTAGACTAAGTGGTGAACATTT  
G L N R C R R S C R L R W L N Y L

*Lapins MYB10.1a* GAAGCCAAATATCAAGATAGGAGGGTTTGCAGAGGATGAAGTAGACCTAATAATAGGCTTCAACAAGCTTTAGGAAACAGGTACCAATAAATACGTGTCTTCTTCCATCCACATCG 600  
K P N I K I G G F A E D E V D L I I R L H K L L G N R  
*Lapins MYB10.1b* GAAGCCAAATATCAAGATAGGAGGGTTTGCAGAGGATGAAGTAGACCTAATAATAGGCTTCAACAAGCTTTAGGAAACAGGTACCAATAAATACGTGTCTTCTTCCATCCACATCG  
K P N I K I G G F A E D E V D L I I R L H K L L G N R  
*Rainier MYB10.1b* GAAGCCAAATATCAAGATAGGAGGGTTTGCAGAGGATGAAGTAGACCTAATAATAGGCTTCAACAAGCTTTAGGAAACAGGTACCAATAAATACGTGTCTTCTTCCATCCACATCG  
K P N I K I G G F A E D E V D L I I R L H K L L G N R

*Lapins MYB10.1a* TTCCTTCATCACATACCTTCAAAAAAATAAAAAATAAATACACAATCGCCGACCAAGCATCCCGTGCCTTTGTTTCTATATATATCTTCTGTTGTTATCTCAGTACGGCATGCACAAC 720  
*Lapins MYB10.1b* TTCCTTCATCACATACCTTCAAAAAAATAAAAAATAAATACACAATCGCCGACCAAGCATCCCGTGCCTTTGTTTCTATATATATCTTCTGTTGTTATCTCAGTACGGCATGCACAAC  
*Rainier MYB10.1b* TTCCTTCATCACATACCTTCAAAAAAATAAAAAATAAATACACAATCGCCGACCAAGCATCCCGTGCCTTTGTTTCTATATATATCTTCTGTTGTTATCTCAGTACGGCATGCACAAC

*Lapins MYB10.1a* CACAAAAAGCAGTAAAGGGCCATGTGCCATGCATGATCATCTAGTCTCTGTGAATCGTAAACATAGTGATCATATATATATGTAGAACATTTACAGAAAGGTTAAATTTGT 840  
CACAAAAAGCAGTAAAGGGCCATGTGCCATGCATGATCATCTAGTCTCTGTGAATCGTAAACATAGTGATCATATATATATGTAGAACATTTACAGAAAGGTTAAATTTGT  
*Lapins MYB10.1b* CACAAAAAGCAGTAAAGGGCCATGTGCCATGCATGATCATCTAGTCTCTGTGAATCGTAAACATAGTGATCATATATATATGTAGAACATTTACAGAAAGGTTAAATTTGT  
*Rainier MYB10.1b* CACAAAAAGCAGTAAAGGGCCATGTGCCATGCATGATCATCTAGTCTCTGTGAATCGTAAACATAGTGATCATATATATATGTAGAACATTTACAGAAAGGTTAAATTTGT

*Lapins MYB10.1a* GTCTGAAAGAATCGGGGTAAACTCAACAATGCTTCTTATGGAAGATAAACATCTACTGTGGTATTCAATTAACAACAACCTGGATCTGCAAAATCTCTACTATATAAGCTCAACCT 960  
GTCTGAAAGAATCGGGGTAAACTCAACAATGCTTCTTATGGAAGATAAACATCTACTGTGGTATTCAATTAACAACAACCTGGATCTGCAAAATCTCTACTATATAAGCTCAACCT  
*Lapins MYB10.1b* GTCTGAAAGAATCGGGGTAAACTCAACAATGCTTCTTATGGAAGATAAACATCTACTGTGGTATTCAATTAACAACAACCTGGATCTGCAAAATCTCTACTATATAAGCTCAACCT  
*Rainier MYB10.1b* GTCTGAAAGAATCGGGGTAAACTCAACAATGCTTCTTATGGAAGATAAACATCTACTGTGGTATTCAATTAACAACAACCTGGATCTGCAAAATCTCTACTATATAAGCTCAACCT

*Lapins MYB10.1a* GTGGTTTGTAGGAAAAATAAACCCTATAAAAGCGTAGTATCTGAAAGTTTACGTGAATCTTCCAACAAAACCTAACAAATCCCTTTCATAGCAGCTGAAACATAAACCTCATTGTTGGAAA 1080  
GTGGTTTGTAGGAAAAATAAACCCTATAAAAGCGTAGTATCTGAAAGTTTACGTGAATCTTCCAACAAAACCTAACAAATCCCTTTCATAGCAGCTGAAACATAAACCTCATTGTTGGAAA  
*Lapins MYB10.1b* GTGGTTTGTAGGAAAAATAAACCCTATAAAAGCGTAGTATCTGAAAGTTTACGTGAATCTTCCAACAAAACCTAACAAATCCCTTTCATAGCAGCTGAAACATAAACCTCATTGTTGGAAA  
*Rainier MYB10.1b* GTGGTTTGTAGGAAAAATAAACCCTATAAAAGCGTAGTATCTGAAAGTTTACGTGAATCTTCCAACAAAACCTAACAAATCCCTTTCATAGCAGCTGAAACATAAACCTCATTGTTGGAAA

*Lapins MYB10.1a* AACATCACATCTTTTAACTTTTTTGGTGTATCATAGCAACAATGATTGATTATTTCTCACGCTATCTGTGAAAGGTGGTCATTGATGCTGGAAGGCTCCAGGAAGGACAGCG 1200  
W S L I A G R L P G R T A  
*Lapins MYB10.1b* AACATCACATCTTTTAACTTTTTTGGTGTATCATAGCAACAATGATTGATTATTTCTCACGCTATCTGTGAAAGGTGGTCATTGATGCTGGAAGGCTCCAGGAAGGACAGCG  
W S L I A G R L P G R T A  
*Rainier MYB10.1b* AACATCACATCTTTTAACTTTTTTGGTGTATCATAGCAACAATGATTGATTATTTCTCACGCTATCTGTGAAAGGTGGTCATTGATGCTGGAAGGCTCCAGGAAGGACAGCG  
W S L I A G R L P G R T A

*Lapins MYB10.1a* AACGATGTGAAAAATTATTGGAACACTCGACTGCGGACGGATTCTCGCCTGAAAAAGGTGAAAGATAAACCCCAAGAAACAATAAAGACCATCGTAATAAGACCTCAACCCCAAGGCTC 1320  
N D V K N Y W N T R L R T D S R L K K V K D K P Q E T I K T I V I R P Q P Q S F  
*Lapins MYB10.1b* AACGATGTGAAAA - TTATTGGAACACTCGACTGCGGACGGATTCTCGCCTGAAAAAGGTGAAAGATAAACCCCAAGAAACAATAAAGACCATCGTAATAAGACCTCAACCCCAAGGCTC 1319  
N D V K I I G T L D C G R I L A \*  
*Rainier MYB10.1b* AACGATGTGAAAA - TTATTGGAACACTCGACTGCGGACGGATTCTCGCCTGAAAAAGGTGAAAGATAAACCCCAAGAAACAATAAAGACCATCGTAATAAGACCTCAACCCCAAGGCTC 1319  
N D V K I I G T L D C G R I L A \*

*Lapins MYB10.1a* ATCAAGAGTCAAATGTTTGGCAGTAAAGAACCAATTTGGACCATATTCAAACGGTGCAGAAATTGTAGTACGCCATCACAACATCACCATCAACAAAGAAATGGAATGATTGGTGG 1440  
I K S S N C L S S K E P I L D H I Q T V E N C S T P S Q T S P S T K N G N D W  
*Lapins MYB10.1b* ATCAAGAGTCAAATGTTTGGCAGTAAAGAACCAATTTGGACCATATTCAAACGGTGCAGAAATTGTAGTACGCCATCACAACATCACCATCAACAAAGAAATGGAATGATTGGTGG 1439  
*Rainier MYB10.1b* ATCAAGAGTCAAATGTTTGGCAGTAAAGAACCAATTTGGACCATATTCAAACGGTGCAGAAATTGTAGTACGCCATCACAACATCACCATCAACAAAGAAATGGAATGATTGGTGG 1439

*Lapins MYB10.1a* GAAACCTTTTTAGGTGACGAGGATGCTTTTGAAGAGCTACATGTTATGGTCTCGCSTTAGAGGAAGAAGGGTTTCAACAGTTTTGGGTTGATGATGCCCAATCGAAAGACAGTGT 1560  
E T F L G D E D A F E R A T C Y G L A L E E E G F T S F W V D D M P Q S K R Q C  
*Lapins MYB10.1b* GAAACCTTTTTAGGTGACGAGGATGCTTTTGAAGAGCTACATGTTATGGTCTCGCSTTAGAGGAAGAAGGGTTTCAACAGTTTTGGGTTGATGATGCCCAATCGAAAGACAGTGT 1559  
*Rainier MYB10.1b* GAAACCTTTTTAGGTGACGAGGATGCTTTTGAAGAGCTACATGTTATGGTCTCGCSTTAGAGGAAGAAGGGTTTCAACAGTTTTGGGTTGATGATGCCCAATCGAAAGACAGTGT 1559

*Lapins MYB10.1a* ACCAATGTTCAAGAGGACTAA 1581  
T N V Q K D \*  
*Lapins MYB10.1b* ACCAATGTTCAAGAGGACTAA 1580  
*Rainier MYB10.1b* ACCAATGTTCAAGAGGACTAA 1580

**Figure S3** Genomic DNA sequence alignment of *PavMYB10.1a* and *PavMYB10.1b*

between the dark red variety ‘Lapins’ and the bluish ‘Rainier’. Intron shows in italics; black triangle indicates position of deletion and asterisk indicates stop codon.

*PavMYB10.2a* ATGGAGGGTTATACTGGGTGTGAGAAAGAGGAGCTTGGACTAGAGAGGAAGATGATCTTCTGAGGCAGTGCATTGAGAAT 81  
M E G Y N L G V R R G A W T R E E D D L L R Q C I E N  
*PavMYB10.2b* ATGGAGGGTTATACTGGGTGTGAGAAAGAGGAGCTTGGACTAGAGAGGAAGATGATCTTCTGAGGCAGTGCATTGAGAAT 81  
M E G Y N L G V R R G A W T R E E D D L L R Q C I E N  
*PavMYB10.2a* CAAGGAGAAGGAAAGTGGCACCAGTTCTTACAAAGCAGGTAITGATGTGAAATATAACTCCAAAAGAGAGATAGATATA  
Q G E G K W H Q V P Y K A  
*PavMYB10.2b* CAAGGAGAAGGAAAGTGGCACCAGTTCTTACAAAGCAGGTAITGATGTGAAATATAACTCCAAAAGAGAGATAGATATA  
Q G E G K W H Q V P Y K A  
*PavMYB10.2a* TGGTATATATATATATATAT AGCTACAGCTTAATTAAGTAGTGAAGCGTTGTCTTAGTGTGTTCTTAAACACACAAAAACG 250  
CGGTATATATATATATATAT AGCTACAGCTTAATTAAGTAGTGAAGCGTTGTCTTAGTGTGTTCTTAAACACACAAAAACG 220  
*PavMYB10.2a* ACATCTGAACTTCCACTCATTATTAATGGTTTTCTGTACGTGTTCTGCTCAAGGGATGTCATACATAAAAAGGCCATTT 324  
...TCCTGAACTTCCACTCATTATTAATGGTTTTCTGTACGTGTTCTGCTCAAGGGATGTCATACATAAAAAGGCCATTT 304  
*PavMYB10.2b* GATATCCAACATTGGGAACCTCTCAAGAAAACACATTATGTAGAGATGCATGCTGTAAACAAAACAAAAACGAAGTTTAA  
GATATCCAACATTGGGAACCTCTCAAGAAAACACATTATGTAGAGATGCATGCTGTAAACAAAACAAAAACGAAGTTTAA  
*PavMYB10.2a* GACCGAGCCTGATAATTTTCATGACAAGTTTTGTGATAAAAACTCAATTTTTTTCATTATGCATGAATGCAGGGTTGAACAGG  
G  
*PavMYB10.2b* GACCGAGCCTGATAATTTTCATGACAAGTTTTGTGATAAAAACTCAATTTTTTTCATTATGCATGAATGCAGGGTTGAACAGG  
G  
*PavMYB10.2a* TTGAACAGGTGCCGGAAGAGCTGTAGACTAAGGTGGTTGAACTATTTGAAGCCAAATATCAAGAGAGGAGACTTTATGGAA  
L N R C R K S C R L R W L N Y L K P N I K R G D F M E  
*PavMYB10.2b* TTGAACAGGTGCCGGAAGAGCTGTAGACTAAGGTGGTTGAACTATTTGAAGCCAAATATCAAGAGAGGAGACTTTATGGAA  
L N R C R K S C R L R W L N Y L K P N I K R G D F M E  
*PavMYB10.2a* GATGAAGTAGATCTAATAATTAGGCTTCATAAGCTTTAGGAAACAGGTACCAATAAATAAATGTCTCTTTCCTTGCATCAACC  
D E V D L I I R L H K L L G N R  
*PavMYB10.2b* GATGAAGTAGATCTAATAATTAGGCTTCATAAGCTTTAGGAAACAGGTACCAATAAATAAATGTCTCTTTCCTTGCATCAACC  
D E V D L I I R L H K L L G N R  
*PavMYB10.2a* ATCTACTCATTGTCCTTAATTAATGAGCTCATAAGCACACATGTCCTGCTGCTTTTATTTAATTTTATTTTGTCTCAGAAGG  
ATCTACTCATTGTCCTTAATTAATGAGCTCATAAGCACACATGTCCTGCTGCTTTTATTTAATTTTATTTTGTCTCAGAAGG  
*PavMYB10.2b* ACAAAAACAAGTTGGCAGCATGCACAGAAAATACATCTCGTAGACTCATACCCCTCTCTGCAAAAGATAAACATTAAATTTCCCGT  
ACAAAAACAAGTTGGCAGCATGCACAGAAAATACATCTCGTAGACTCATACCCCTCTCTGCAAAAGATAAACATTAAATTTCCCGT  
*PavMYB10.2a* TCAAATCTCATATACTTTCAAGCTAGTCATACAAAGAACATTACTTCAAAATATTTAATTTTATAATTTTAAATTTCTTAGTACTTT  
TCAAATCTCATATACTTTCAAGCTAGTCATACAAAGAACATTACTTCAAAATATTTAATTTTATAATTTTAAATTTCTTAGTACTTT  
*PavMYB10.2b* TCAAATCTCATATACTTTCAAGCTAGTCATACAAAGAACATTACTTCAAAATATTTAATTTTATAATTTTAAATTTCTTAGTACTTT  
TCAAATCTCATATACTTTCAAGCTAGTCATACAAAGAACATTACTTCAAAATATTTAATTTTATAATTTTAAATTTCTTAGTACTTT  
*PavMYB10.2a* GGCAATCTCTGCTCCTAATGCAGGTTAATGTATAATTATGGGGTCAACACCCCAATTAAGCGGTGGCACAATAATATGCTC  
GGCAATCTCTGCTCCTAATGCAGGTTAATGTATAATTATGGGGTCAACACCCCAATTAAGCGGTGGCACAATAATATGCTC  
*PavMYB10.2b* CCTAACATTATGTTCCCATACCTAGCAAAAATTAATTAATTAATTCATAGGAAATTTATTTGCTCTTGTGTTACTTGGGTGAAAA  
CCTAACATTATGTTCCCATACCTAGCAAAAATTAATTAATTAATTCATAGGAAATTTATTTGCTCTTGTGTTACTTGGGTGAAAA  
*PavMYB10.2a* TTTTATACCTATGTTGGGCTCCTTTCCCTTTTACTTTTACTTTTACTTTTACTTTTACTTTTACTTTTACTTTTACTTTTACTTT  
TTTTATACCTATGTTGGGCTCCTTTCCCTTTTACTTTTACTTTTACTTTTACTTTTACTTTTACTTTTACTTTTACTTTTACTTT  
*PavMYB10.2b* TTTTATACCTATGTTGGGCTCCTTTCCCTTTTACTTTTACTTTTACTTTTACTTTTACTTTTACTTTTACTTTTACTTTTACTTT  
TTTTATACCTATGTTGGGCTCCTTTCCCTTTTACTTTTACTTTTACTTTTACTTTTACTTTTACTTTTACTTTTACTTTTACTTT  
*PavMYB10.2a* AGTTGGCGCCCTTAAACATAGTTTGGAGCTCTAAAAGGGGGAAGATGTTGGTTGCGTTGGGTTGGATTAGCCAGCACGA  
AGTTGGCGCCCTTAAACATAGTTTGGAGCTCTAAAAGGGGGAAGATGTTGGTTGCGTTGGGTTGGATTAGCCAGCACGA  
*PavMYB10.2b* GACTATGGGTTTAGCCGGTATGACGCTATGATTTCTTCTGGTTGCCCGGAAGATGTTGGAGTGGTGGCTTATATTTCTTAGTT  
GACTATGGGTTTAGCCGGTATGACGCTATGATTTCTTCTGGTTGCCCGGAAGATGTTGGAGTGGTGGCTTATATTTCTTAGTT  
*PavMYB10.2a* TTGTTTAGACTAATAATTTTCAAAAACCTTTAGGAGTTTGGTGTGATTTGTTTCTATTAAAAAAATTTATTTCTTAGCTTT  
TTGTTTAGACTAATAATTTTCAAAAACCTTTAGGAGTTTGGTGTGATTTGTTTCTATTAAAAAAATTTATTTCTTAGCTTT  
*PavMYB10.2b* GGCTTATAATACGAATTTGCCATTTTACCGTTTGGCGGGCAAATTTGATTGTATGCTGTGAGTACATGTGCTTCTAGTTACTGAA  
GGCTTATAATACGAATTTGCCATTTTACCGTTTGGCGGGCAAATTTGATTGTATGCTGTGAGTACATGTGCTTCTAGTTACTGAA  
*PavMYB10.2a* TGAGGGATTAGTCATTAATGGATTGTGCGGTGATTTCTCCAGATCAATTCATATGTTTGGTGTGTTGGTCTAGAGAAAGATT  
TGAGGGATTAGTCATTAATGGATTGTGCGGTGATTTCTCCAGATCAATTCATATGTTTGGTGTGTTGGTCTAGAGAAAGATT  
*PavMYB10.2b* TACTCATATTCGGCACATAGTTGCTTTGACTTTTATTTGTTTATTTGTTTATTTGTTTATTTGTTTATTTGTTTATTTGTTTATTTGTTT  
TACTCATATTCGGCACATAGTTGCTTTGACTTTTATTTGTTTATTTGTTTATTTGTTTATTTGTTTATTTGTTTATTTGTTTATTTGTTT  
*PavMYB10.2a* AAAAAACTAGCATACAAATGTATTAACCTTCTCATGCTATGTGTTGAAGGTGGTCATTGATTGCTCAAAGACTCCAGGAAGGA  
W S L I A Q R L P G R  
*PavMYB10.2b* AAAAAACTAGCATACAAATGTATTAACCTTCTCATGCTATGTGTTGAAGGTGGTCATTGATTGCTCAAAGACTCCAGGAAGGA  
W S L I A Q R L P G R  
*PavMYB10.2a* CTGCGAATGATGTGAAAAATTAAGTGAACACCCGATTGCGGACGGATTGTTGCTGAAAAAGATGAAAGACAAATCCCAAG  
T A N D V K N Y W N T R L R T D C C L K K M K D K S Q  
*PavMYB10.2b* CTGCGAATGATGTGAAAAATTAAGTGAACACCCGATTGCGGACGGATTGTTGCTGAAAAAGATGAAAGACAAATCCCAAG  
T A N D V K N Y W N T R L R T D C C L K K M K D K S Q  
*PavMYB10.2a* AAACAATAAAGACCATCAAAAAGGCCACAACCAAGGCTTCAACAAAAGTTCAAATGTTTGAAGTTTAAAGAACCAATT  
E T I K T I I K R P Q P R S F T K S S N C L S F K E P I  
*PavMYB10.2b* AAACAATAAAGACCATCAAAAAGGCCACAACCAAGGCTTCAACAAAAGTTCAAATGTTTGAAGTTTAAAGAACCAATT  
E T I K T I I K R P Q P R S F T K S S N C L S F K E P I  
*PavMYB10.2a* TTGACGATACTCAACTAGAAGAGAATTTAGTACGCCATCACAACATCAACATCAACAAGGATTGGAAGTGAATGGTGGGA  
L D D T Q L E E N F S T P S Q T S T S T R I G S D W W E  
*PavMYB10.2b* TTGACGATACTCAACTAGAAGAGAATTTAGTACGCCATCACAACATCAACATCAACAAGGATTGGAAGTGAATGGTGGGA  
L D D T Q L E E N F S T P S Q T S T S T R I G S D W W E  
*PavMYB10.2a* GACCTTTTATGATGACAAGGATGCTACTGAAAGAGCTACAGGTTCTGGTCTTGGGTTAGATGAAGAAATGCTCGCAAGTTTTT  
T F L D D K D A T E R A T G S G L G L D E E L L A S F  
*PavMYB10.2b* GACCTTTTATGATGACAAGGATGCTACTGAAAGAGCTACAGGTTCTGGTCTTGGGTTAGATGAAGAAATGCTCGCAAGTTTTT  
T F L D D K D A T E R A T G S G L G L D E E L L A S F  
*PavMYB10.2a* GGGTTGATGATGATGCCACAATGGACAAGACGTGCATCAATTTTCTGAAGAAGGACTAAGTAGAGGTTGATTTCTCTTTA  
W V D D D M P Q W T R T C I N F S E E G L S R G D F S F  
*PavMYB10.2b* GGGTTGATGATGATGCCACAATGGACAAGACGTGCATCAATTTTCTGAAGAAGGACTAAGTAGAGGTTGATTTCTCTTTA  
W V D D D M P Q W T R T C I N F S E E G L S R G D F S F  
*PavMYB10.2a* GCATGGACCTTTGGAATCATTCAAAGAAGAATAG 2223  
S M D L W N H S K E E \*  
*PavMYB10.2b* GCATGGACCTTTGGAATCATTCAAAGAAGAATAG 2193  
S M D L W N H S K E E \*

**Figure S4** Genomic DNA sequence alignment of *PavMYB10.2a* and *PavMYB10.2b*.

Intron shows in italics; asterisk indicates stop codon.

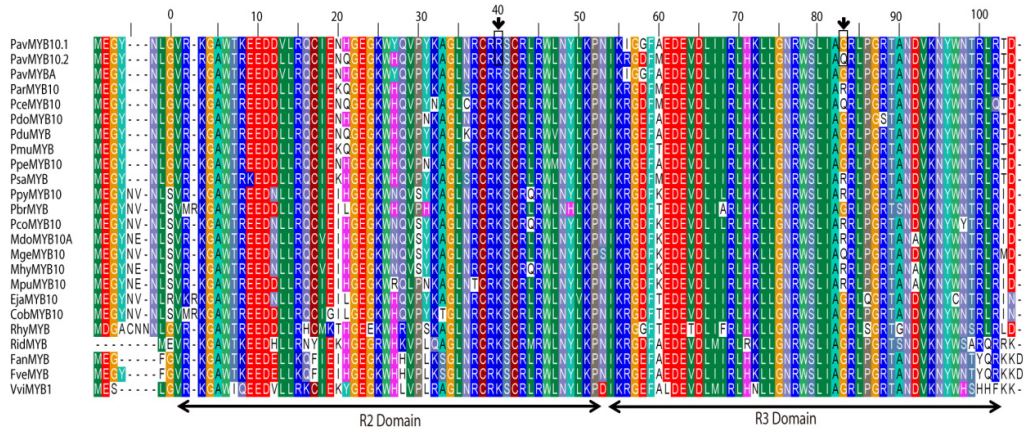

**Figure S5** Protein sequence alignment of *PavMYB10.1*, *PavMYB10.2*, and other genes from different species. Black arrow indicates key amino acid residue difference. Double-sided arrow indicates R2 and R3 domains.



```

Lapins MYB10.1a ATGGAGGGCTAACTTGGGTGTGAGAAAAGGAGCTTGGACTAAAGAGGAAGATGATGTTTTGAGGCAGTGCAATGAGAATCATGGAGAAGGAAAGTGGT 100
MEGYNLGVRKGAWTK EEDDVL RQCIENHGE GKW
Lapins MYB10.1b ATGGAGGGCTAACTTGGGTGTGAGAAAAGGAGCTTGGACTAAAGAGGAAGATGATGTTTTGAGGCAGTGCAATGAGAATCATGGAGAAGGAAAGTGGT 100
MEGYNLGVRKGAWTK EEDDVL RQCIENHGE GKW
Rainier MYB10.1b ATGGAGGGCTAACTTGGGTGTGAGAAAAGGAGCTTGGACTAAAGAGGAAGATGATGTTTTGAGGCAGTGCAATGAGAATCATGGAGAAGGAAAGTGGT 100
MEGYNLGVRKGAWTK EEDDVL RQCIENHGE GKW
Lapins MYB10.1a ACCAAGTTCCTTACAAGCAGGGTTGACACAGGTGCAGGAGGAGCTGTAGACTAAGGTGGTTGAACTATTTGAAGCCAAATATCAAGATAGGAGGGTTTGC 200
YQVPYKAGLNRRCRRS CRLRWLN YLKPNIKI GGF A
Lapins MYB10.1b ACCAAGTTCCTTACAAGCAGGGTTGACACAGGTGCAGGAGGAGCTGTAGACTAAGGTGGTTGAACTATTTGAAGCCAAATATCAAGATAGGAGGGTTTGC 200
YQVPYKAGLNRRCRRS CRLRWLN YLKPNIKI GGF A
Rainier MYB10.1b ACCAAGTTCCTTACAAGCAGGGTTGACACAGGTGCAGGAGGAGCTGTAGACTAAGGTGGTTGAACTATTTGAAGCCAAATATCAAGATAGGAGGGTTTGC 200
YQVPYKAGLNRRCRRS CRLRWLN YLKPNIKI GGF A
Lapins MYB10.1a AGAGGATGAAGTAGACCTAATAATAGGCTTCACAAGCTTTTAGGAAACAGGTGGTCAATTGATGCTGGAAAGCTTCCAGGAAGGACAGGAAAGGATGTG 300
EEDVLLIIRLHKL L L GN R W S L I A G R L P G R T A N D V
Lapins MYB10.1b AGAGGATGAAGTAGACCTAATAATAGGCTTCACAAGCTTTTAGGAAACAGGTGGTCAATTGATGCTGGAAAGCTTCCAGGAAGGACAGGAAAGGATGTG 300
EEDVLLIIRLHKL L L GN R W S L I A G R L P G R T A N D V
Rainier MYB10.1b AGAGGATGAAGTAGACCTAATAATAGGCTTCACAAGCTTTTAGGAAACAGGTGGTCAATTGATGCTGGAAAGCTTCCAGGAAGGACAGGAAAGGATGTG 300
EEDVLLIIRLHKL L L GN R W S L I A G R L P G R T A N D V
Lapins MYB10.1a AAAAAATTATGGAACACTGACTGCGGACGGATTCTGCGCTGAAAAAGGTGAAAGATAAACCCCAAGAAACAATAAAGACCATGTGTAATAAGACCTCAAC 400
KNYWNTRRLRTD S R L K K V K D K P Q E T I K T I V I R P Q
Lapins MYB10.1b AAAA-TTATGGAACACTGACTGCGGACGGATTCTGCGCTGAAAAAGGTGAAAGATAAACCCCAAGAAACAATAAAGACCATGTGTAATAAGACCTCAAC 399
KAIIGTLD C G R I L A *
Rainier MYB10.1b AAAA-TTATGGAACACTGACTGCGGACGGATTCTGCGCTGAAAAAGGTGAAAGATAAACCCCAAGAAACAATAAAGACCATGTGTAATAAGACCTCAAC 399
KAIIGTLD C G R I L A *
Lapins MYB10.1a CCCAAAGCTTCATCAAGAGTTCAAATTTGTTGAGCAGTAAAGAAACCAATTTTGGACCATATTTCAAACGGTGGAGAATTGTAGTACGCCATCACAACATC 500
PQSFIKSSNCLSS KEPI LDHI QTVENC STPS QTS
Lapins MYB10.1b CCCAAAGCTTCATCAAGAGTTCAAATTTGTTGAGCAGTAAAGAAACCAATTTTGGACCATATTTCAAACGGTGGAGAATTGTAGTACGCCATCACAACATC 499
CCCAAAGCTTCATCAAGAGTTCAAATTTGTTGAGCAGTAAAGAAACCAATTTTGGACCATATTTCAAACGGTGGAGAATTGTAGTACGCCATCACAACATC 499
Rainier MYB10.1b ACCATCAACAAGAAATGGAAATGATTGGTGGGAAACCTTTTTAGGTGACGAGGATGCTTTTGAAGAGCTACATGTTATGGTCTGCGTTAGAGGAAGAA 600
PSTKN GNDWETF L G D E D A F E R A T C Y G L A L E E E
Lapins MYB10.1b ACCATCAACAAGAAATGGAAATGATTGGTGGGAAACCTTTTTAGGTGACGAGGATGCTTTTGAAGAGCTACATGTTATGGTCTGCGTTAGAGGAAGAA 599
ACCATCAACAAGAAATGGAAATGATTGGTGGGAAACCTTTTTAGGTGACGAGGATGCTTTTGAAGAGCTACATGTTATGGTCTGCGTTAGAGGAAGAA 599
Rainier MYB10.1b GGGTTCACAAGTTTTGGGTTGATGATATGCCACAATCGAAAAGACAGTGTACCAATGTTTCAGAAGGACTAA 672
GFTSFWVD D M P Q S K R Q C T N V Q K D *
Lapins MYB10.1b GGGTTCACAAGTTTTGGGTTGATGATATGCCACAATCGAAAAGACAGTGTACCAATGTTTCAGAAGGACTAA 671
GGTTCACAAGTTTTGGGTTGATGATATGCCACAATCGAAAAGACAGTGTACCAATGTTTCAGAAGGACTAA 671
Rainier MYB10.1b

```

**Figure S6** Alignment cDNA of *PavMYB10.1* in sweet cherry ‘Lapins’ and ‘Rainier’.

Coding sequence alignment of *PavMYB10.1a* and *PavMYB10.1b* between dark-red variety ‘Lapins’ and blush variety ‘Rainier’. Upwards arrow indicates position of deletion, asterisk marks stop codon.

*PavMYB10.2a* ATGGAGGGTTATAACTTGGGTGTGAGAAGAGGAGCTTGGACTAGAGAGGAAGATGATCTTCTGAGGCAGTGCATTGAGAA 80  
M E G Y N L G V R R G A W T R E E D D L L R Q C I E N  
*PavMYB10.2b* ATGGAGGGTTATAACTTGGGTGTGAGAAGAGGAGCTTGGACTAGAGAGGAAGATGATCTTCTGAGGCAGTGCATTGAGAA 80  
M E G Y N L G V R R G A W T R E E D D L L R Q C I E N

*PavMYB10.2a* TCAAGGAGAAGGAAAGTGGCACCAGTTCCCTTACAAGCAGGGTTGAACAGGTGCCGGAAGAGCTGTAGACTAAGGTGGT 180  
Q G E G K W H Q V P Y K A G L N R C R K S C R L R W  
*PavMYB10.2b* TCAAGGAGAAGGAAAGTGGCACCAGTTCCCTTACAAGCAGGGTTGAACAGGTGCCGGAAGAGCTGTAGACTAAGGTGGT 180  
Q G E G K W H Q V P Y K A G L N R C R K S C R L R W

*PavMYB10.2a* TGAAC TATTGAAGCCAAATATCAAGAGAGGAGACTTTATGGAAGATGAAGTAGATCTAATAATTAGGCTTCATAAGCTT 240  
L N Y L K P N I K R G D F M E D E V D L I I R L H K L  
*PavMYB10.2b* TGAAC TATTGAAGCCAAATATCAAGAGAGGAGACTTTATGGAAGATGAAGTAGATCTAATAATTAGGCTTCATAAGCTT 240  
L N Y L K P N I K R G D F M E D E V D L I I R L H K L

*PavMYB10.2a* TTAGGAACAGGTGGTCATTGATTGCTCAAAGACTCCAGGAAGGACTCGCAATGATGTGAAAAATTACTGGAACACCCG 320  
L G N R W S L I A Q R L P G R T A N D V K N Y W N T R  
*PavMYB10.2b* TTAGGAACAGGTGGTCATTGATTGCTCAAAGACTCCAGGAAGGACTCGCAATGATGTGAAAAATTACTGGAACACCCG 320  
L G N R W S L I A Q R L P G R T A N D V K N Y W N T R

*PavMYB10.2a* ATTGCGGACGGATTGTTGCCTGAAAAAGATGAAAGACAATCCCAAGAAACAATAAAGACCATCATAAAAAGGCCACAAC 400  
L R T D C C L K K M K D K S Q E T I K T I I K R P Q  
*PavMYB10.2b* ATTGCGGACGGATTGTTGCCTGAAAAAGATGAAAGACAATCCCAAGAAACAATAAAGACCATCATAAAAAGGCCACAAC 400  
L R T D C C L K K M K D K S Q E T I K T I I K R P Q

*PavMYB10.2a* CAAGAAGCTTCAACAAAAGTTCAAATTTGTTGAGTTTTAAAGAACCAATTTTGGACGATACTCAACTAGAAGAGAATTTT 480  
P R S F T K S S N C L S F K E P I L D D T Q L E E N F  
*PavMYB10.2b* CAAGAAGCTTCAACAAAAGTTCAAATTTGTTGAGTTTTAAAGAACCAATTTTGGACGATACTCAACTAGAAGAGAATTTT 480  
P R S F T K S S N C L S F K E P I L D D T Q L E E N F

*PavMYB10.2a* AGTACGCCATCACAAACATCAACATCAACAAGGATTGGAAGTGATTGGTGGGAGACCTTTTTAGATGACAAGGATGCTAC 560  
S T P S Q T S T S T R I G S D W W E T F L D D K D A T  
*PavMYB10.2b* AGTACGCCATCACAAACATCAACATCAACAAGGATTGGAAGTGATTGGTGGGAGACCTTTTTAGATGACAAGGATGCTAC 560  
S T P S Q T S T S T R I G S D W W E T F L D D K D A T

*PavMYB10.2a* TGAAGAGCTACAGGTTCTGGTCTTGGGTTAGATGAAGAATTGCTCGCAAGTTTTGGGTTGATGATGATATGCCACAAT 640  
E R A T G S G L G L D E E L L A S F W V D D D M P Q  
*PavMYB10.2b* TGAAGAGCTACAGGTTCTGGTCTTGGGTTAGATGAAGAATTGCTCGCAAGTTTTGGGTTGATGATGATATGCCACAAT 640  
E R A T G S G L G L D E E L L A S F W V D D D M P Q

*PavMYB10.2a* GGACAAGAACGTGCATCAATTTTTCTGAAGAAGGACTAAGTAGAGGTGATTTCTCTTTTAGCATGGACCTTTGGAATCAT 720  
W T R T C I N F S E E G L S R G D F S F S M D L W N H  
*PavMYB10.2b* GGACAAGAACGTGCATCAATTTTTCTGAAGAAGGACTAAGTAGAGGTGATTTCTCTTTTAGCATGGACCTTTGGAATCAT 720  
W T R T C I N F S E E G L S R G D F S F S M D L W N H

*PavMYB10.2a* TCAAAGAAGAATAG 735  
S K E E \*  
*PavMYB10.2b* TCAAAGAAGAATAG 735  
S K E E \*

**Figure S7** Alignment cDNA of *PavMYB10.2a* and *PavMYB10.2b*. Coding sequence alignment of *PavMYB10.2a* and *PavMYB10.2b* between dark-red variety ‘Lapins’ and blush variety ‘Rainier’. asterisk marks stop codon.

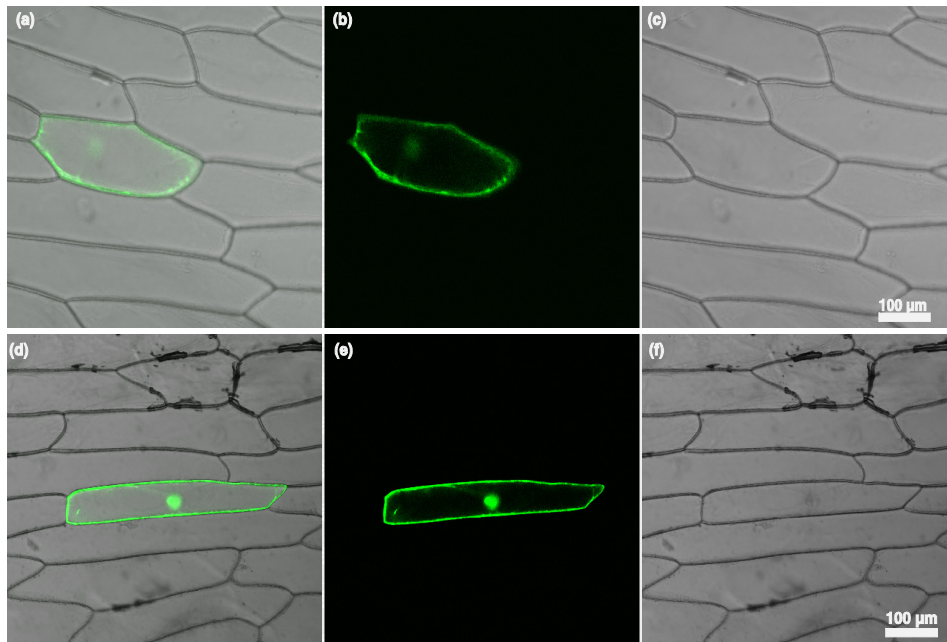

**Figure S8** Cellular localization of *PavMYB10.1* in onion epidermal cells. Onion bulb cells were bombarded with gold particles coated with plasmids. (a) The combination of cell morphology in dark field for green fluorescence and bright light for pEVS-NL-GFP. (b) Cell morphology in dark field for green fluorescence for pEVS-NL-GFP. (c) Cell morphology in bright light for pEVS-NL-GFP. (d) The combination of cell morphology in dark field for green fluorescence and bright light for pEVS-NL-PavMYB10.1-GFP. (e) Cell morphology in dark field for green fluorescence for pEVS-NL-PavMYB10.1-GFP. (f) Cell morphology in bright light for pEVS-NL-PavMYB10.1-GFP.

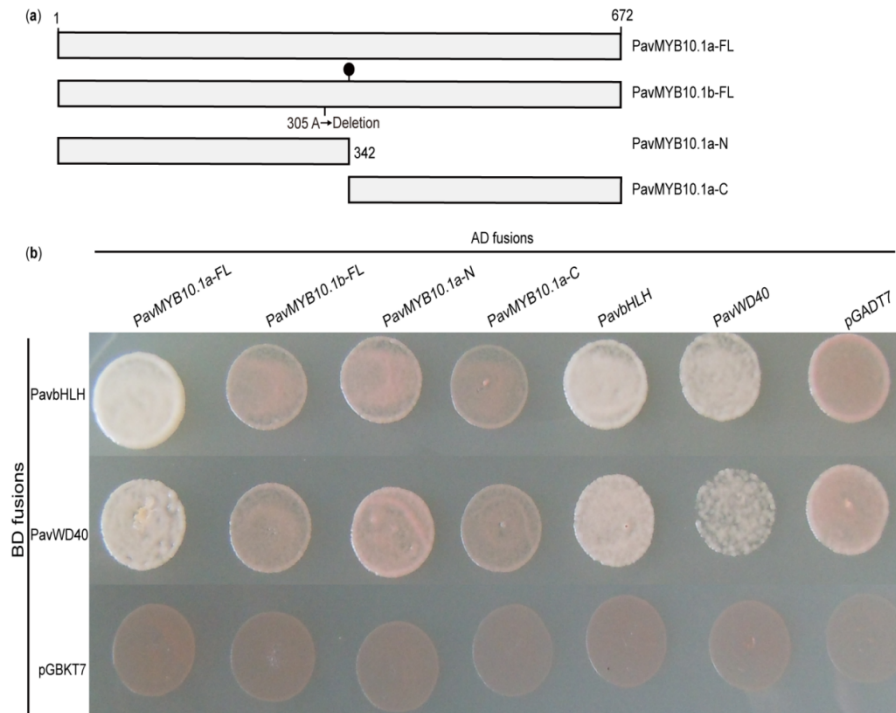

**Figure S9** Interaction of PavMYB10.1 with PavbHLH and PavWD40. (a) Schematics of *PavMYB10.1a* and *PavMYB10.1b* were used in yeast two-hybrid assays. Solid circle marks stop codon. (b) Yeast two-hybrid assays of PavMYB10.1a and PavMYB10.1b with PavbHLH and PavWD40. Indicated combinations of bait (BD fusion) and prey (AD fusion) constructs were introduced into yeast reporter strain AH109. Transformants were streaked on selective medium (SD/-Leu-Trp) and then the single clone on medium (SD/-Leu-Trp) were inoculated on selective medium (SD/-Ade-His-Leu-Trp). Empty vectors pGBKT7 and pGADT7 were negative controls. Plates were photographed after incubation at 30°C for 7 days.

**Table S1** Correlations between anthocyanin content and relative expressions of *PavMYB10.1* and structural genes in ‘Big Dragon’, ‘Rainier’, and ‘Lapins’.

| Gene name         | Big Dragon  |                | Rainier     |                | Lapins      |                |
|-------------------|-------------|----------------|-------------|----------------|-------------|----------------|
|                   | Correlation | <i>p</i> value | Correlation | <i>p</i> value | Correlation | <i>p</i> value |
| <i>PavMYB10.1</i> | –           | –              | 0.913**     | 0.002          | 0.854*      | 0.014          |
| <i>PavPAL</i>     | –           | –              | -0.416      | 0.306          | 0.288       | 0.488          |
| <i>PavC4H</i>     | –           | –              | -0.401      | 0.325          | 0.272       | 0.515          |
| <i>Pav4CL</i>     | –           | –              | -0.398      | 0.329          | 0.133       | 0.754          |
| <i>PavCHS</i>     | –           | –              | -0.446      | 0.269          | 0.596       | 0.119          |
| <i>PavCHI</i>     | –           | –              | -0.495      | 0.212          | 0.845**     | 0.008          |
| <i>PavF3H</i>     | –           | –              | -0.46       | 0.252          | -0.057      | 0.894          |
| <i>PavF3'H</i>    | –           | –              | -0.564      | 0.145          | 0.717*      | 0.045          |
| <i>PavDFR</i>     | –           | –              | -0.406      | 0.319          | 0.452       | 0.261          |
| <i>PavANS</i>     | –           | –              | -0.122      | 0.773          | 0.845**     | 0.008          |
| <i>PavUFGT</i>    | –           | –              | 0.780*      | 0.022          | 0.857**     | 0.007          |
| <i>PavLAR</i>     | –           | –              | -0.348      | 0.398          | -0.394      | 0.334          |
| <i>PavANR</i>     | –           | –              | -0.447      | 0.267          | -0.332      | 0.422          |
| <i>PavFLS</i>     | –           | –              | -0.34       | 0.41           | -0.13       | 0.758          |

\* Correlation is significant at the 0.05 level (2-tailed). \*\* Correlation is significant at the 0.01 level (2-tailed).

**Table S2** Correlations between relative expression of *PavMYB10.1* and that of structural genes in ‘Big Dragon’, ‘Rainier’, and ‘Lapins’.

| Genes          | Big Dragon  |                | Rainier     |                | Lapins      |                |
|----------------|-------------|----------------|-------------|----------------|-------------|----------------|
|                | Correlation | <i>p</i> value | Correlation | <i>p</i> value | Correlation | <i>p</i> value |
| <i>PavPAL</i>  | –           | –              | -0.364      | 0.376          | 0.785*      | 0.021          |
| <i>PavC4H</i>  | –           | –              | -0.311      | 0.454          | 0.241       | 0.565          |
| <i>Pav4CL</i>  | –           | –              | -0.298      | 0.473          | 0.023       | 0.957          |
| <i>PavCHS</i>  | –           | –              | -0.35       | 0.396          | 0.271       | 0.517          |
| <i>PavCHI</i>  | –           | –              | -0.413      | 0.31           | 0.458       | 0.254          |
| <i>PavF3H</i>  | –           | –              | -0.366      | 0.373          | -0.185      | 0.661          |
| <i>PavF3'H</i> | –           | –              | -0.494      | 0.214          | 0.574       | 0.136          |
| <i>PavDFR</i>  | –           | –              | -0.316      | 0.445          | 0.29        | 0.486          |
| <i>PavANS</i>  | –           | –              | -0.087      | 0.838          | 0.902**     | 0.002          |
| <i>PavUFGT</i> | –           | –              | 0.956**     | 0              | 0.861**     | 0.006          |
| <i>PavLAR</i>  | –           | –              | -0.232      | 0.58           | -0.038      | 0.928          |
| <i>PavANR</i>  | –           | –              | -0.35       | 0.395          | -0.547      | 0.161          |
| <i>PavFLS</i>  | –           | –              | -0.226      | 0.591          | 0.446       | 0.269          |

\* Correlation is significant at the 0.05 level (2-tailed). \*\* Correlation is significant at the 0.01 level (2-tailed).

**Table S3** Sequences of oligonucleotide primers were used in this work (F, forward; R, reverse).

| Purpose  | Accession                  | Alias*                                 | Sequence (5→3)                                           |                                                          |
|----------|----------------------------|----------------------------------------|----------------------------------------------------------|----------------------------------------------------------|
| qRT-PCR  | JF748833                   | <i>PavCHS</i>                          | F: GCTCGTGTCTTGTGTGTGC<br>R: ACTGTCGGGAAGGATGGTTTG       |                                                          |
|          | JF740091                   | <i>PavCHI</i>                          | F: TCCACCGTCAGTCAAACCAC<br>R: CCTCCAAGTACACGCCAATC       |                                                          |
|          | JF740092                   | <i>PavF3H</i>                          | F: CATCGTCTCCAGCCATTACAG<br>R: ATCAGCTCGTCGCTGTACTTCTG   |                                                          |
|          | KF974775                   | <i>PavDFR</i>                          | F: CATCCATGCCACCAAGCCTC<br>R: AAGTGAACGAAGTGCCTCCG       |                                                          |
|          | KF974776                   | <i>PavANS</i>                          | F: GCCTTTTTCGATCTTCCCAT<br>R: CTTCTCCAGCTCCCTTC          |                                                          |
|          | KF974777                   | <i>PavUFGT</i>                         | F: ATGTCGGACCTTCAACCTA<br>R:GGCACCACCATCCCATTACT         |                                                          |
|          | GU990523                   | <i>Pav4CL</i>                          | F: CCAATGCCAAGCTCATCATCA<br>R: GAGAAATGCAAGCAATTCTCTGG   |                                                          |
|          | GU990522                   | <i>PavC4H</i>                          | F: GAAGATCTGCGAAGAGGTCAAA<br>R: GTCCTCGTTGATCTCTCCC      |                                                          |
|          | GU938688                   | <i>PavANR</i>                          | F: GACCTTGTTTTCCATGTTGCC<br>R: CGACACTGCAGCTGCTGATGA     |                                                          |
|          | GU938685                   | <i>PavFLS</i>                          | F: TTATTACCCACCATGTCCCCG<br>R: ATGTACTTAACGTCGTACC       |                                                          |
|          | GU938686                   | <i>PavLAR</i>                          | F: GGCTGACATCATCAAAGCCCT<br>R: ATCTGGTCCAATATTGTTG       |                                                          |
|          | AF036948                   | <i>PavPAL</i>                          | F: CATAAGATTGAGATCTTGAA<br>R: CTGAGGGTCTGGCCATCTGGT      |                                                          |
|          | JQ697494                   | <i>F3'H</i>                            | F: GTGGCCTATTGTTGGAAATTGC<br>R: GCTTGAGAAGTTGGTGTCTGTTGG |                                                          |
|          | KP455680                   | <i>PavMYB</i>                          | F: GGTGGTCATTGATTGCTGGA<br>R: GTGATGTTTGTGATGGCGTA       |                                                          |
|          | FJ560908                   | <i>PavACTIN</i>                        | F: CCAGGGCTGTGTTTCCTTCTATT<br>R: ATGATCTGCGTCATCTTTTCT   |                                                          |
|          | Cloning                    | KP455680                               | <i>PavMYB10.1</i>                                        | F: ATGGAGGGCTATAACTTGGGTG<br>R: TTAGTCCTTCTGAACATTGGTACA |
|          |                            | ABX71943                               | <i>PavMYB10.2</i>                                        | R:ATGGAGGGTTATAACTTGGGTG<br>F:CTATTCTTCTTTGAATGATTCCA    |
|          | Yeast two-hybrid           | KP126521                               | <i>PavbHLH-EcoR I</i>                                    | F:GAAATTGAAATTCATGGCTGCACCGCCAAGCAGCA                    |
|          |                            |                                        | <i>PavbHLH-Pst I</i>                                     | R:GAAATTCIGCAGTCAGATTGGGGAATTATTTGATTTA                  |
| KP143539 |                            | <i>PavWD40-Nde I</i>                   | F:GAAATTCATATGATGGAGAAGTGCAGACAAGAATC                    |                                                          |
|          |                            | <i>PavWD40-EcoR I</i>                  | R:GAAATTGAAATCTCAAACCTTCAAAGCTGCATC                      |                                                          |
| KP455682 |                            | <i>PavMYB10.1-FL-Nde I</i>             | F:GAAATTCATATGATGGAGGGCTATAACTTGGGTG                     |                                                          |
|          | <i>PavMYB10.1-FL-Xho I</i> | R:GAAATTCICGAGTTAGTCCTTCTGAACATTGGTACA |                                                          |                                                          |
| KP455683 | <i>PavMYB10.1-N-Xho I</i>  | R: GAAATTCICGAGTTCAGGCGAGAATCCGTCCG    |                                                          |                                                          |

|                                                       |          |                                           |                                            |
|-------------------------------------------------------|----------|-------------------------------------------|--------------------------------------------|
| Subcellularly localized Chromatin immunoprecipitation | KP455680 | <i>PavMYB10.1-C-Nde I</i>                 | F:GAAATTCATATGAAAAAGGTGAAAGATAAACCCCAAG    |
|                                                       |          | <i>PavMYB10.1-GFP-Xho I</i>               | F:GAAATTCCTCGAGATGGAGGGCTATAACTTGGGTG      |
|                                                       |          | <i>PavMYB10.1-GFP-Sac II</i>              | R:GAAATTCCTCGGGTCCCTTCTGAACATTGGTACA       |
|                                                       | KF974776 | Promoter of <i>PavANS</i>                 | F:TTGATAAAATTGAAAGAAACAT                   |
|                                                       | KF974777 | Promoter of <i>PavUFGT</i>                | R: CAAGCATTTTGCTAATATTTCAAA                |
|                                                       |          |                                           | F: CGATATTTAGAGAGAGAAACAA                  |
|                                                       |          |                                           | R: GATTTGGATGAGATTGGATT                    |
| SNP marker                                            | AF036948 | Promoter of <i>PavPAL</i>                 | F: ATCCACAGATGATCATAACGGTC                 |
|                                                       |          |                                           | R: TGGGAAAATACAAAAACTGATG                  |
|                                                       |          | Marker1637                                | F:TCACACTGATGATGACTCATACTTTGTAATTCAGTACTTG |
|                                                       |          | Marker3823                                | R:CTAATCTCTAAACTGTTTTTGAGAATCGAATTTGCAATG  |
|                                                       |          | F:GCTTGTGAAACTGTACTTTTGCTTGTGTGATTGTGTGTA |                                            |
|                                                       |          | R:CTGCTGCATATCTTTGGTCAGTTTTCAATCATTATCATT |                                            |

---
